# Supplementary material
Source: Springer Nature journal article supplement (https://www.springermedizin.de/resource/supplementary/12890_2013_578_MOESM2_ESM.pdf/9505354)

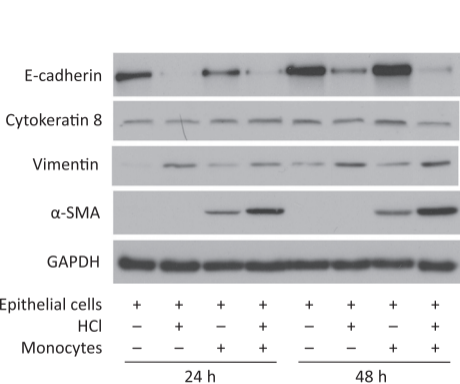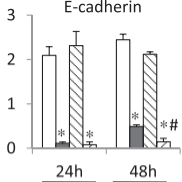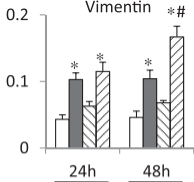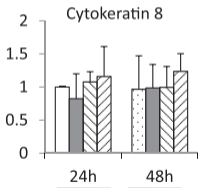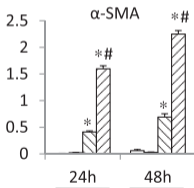

|                  |   |   |   |   |   |   |   |   |
|------------------|---|---|---|---|---|---|---|---|
| Epithelial cells | + | + | + | + | + | + | + | + |
| HCl              | - | + | - | + | - | + | - | + |
| Monocytes        | - | - | + | + | - | - | + | + |

Supplement: MOESM2 [file 9505354]
